# Supplementary material for: Effect of light on photosynthetic efficiency of sequestered chloroplasts in intertidal benthic foraminifera ( Haynesina germanica and Ammonia tepida )
Source: Copernicus journal article supplement (doi:10.5194/bg-2015-656), 2016-01-18
Supplement: Supplementary file [file bg-2015-656-AC1-supplement.pdf]

1 **Effect of light on photosynthetic efficiency of sequestered**  
2 **chloroplasts in intertidal benthic foraminifera (*Haynesina***  
3 ***germanica* and *Ammonia tepida*)**

4 **Thierry Jauffrais<sup>1\*</sup>, Bruno Jesus<sup>2,3\*</sup>, Edouard Metzger<sup>1</sup>, Jean-Luc Mouget<sup>4</sup>,**  
5 **Frans Jorissen<sup>1</sup>, Emmanuelle Geslin<sup>1</sup>**

6 [1]{UMR CNRS 6112 LPG-BIAF, Bio-Indicateurs Actuels et Fossiles, Université d'Angers,  
7 2 Boulevard Lavoisier, 49045 Angers Cedex 1, France}

8 [2]{EA2160, Laboratoire Mer Molécules Santé, 2 rue de la Houssinière, Université de  
9 Nantes, 44322 Nantes Cedex 3, France}

10 [3]{BioISI – Biosystems & Integrative Sciences Institute, Campo Grande University of  
11 Lisboa, Faculty of Sciences, 1749-016 Lisboa, Portugal}

12 [4]{EA2160, Laboratoire Mer Molécules Santé, Université du Maine, Ave O. Messiaen,  
13 72085 Le Mans cedex 9, France}

14 [\*]{The first two authors contributed equally to this work}.

15 Correspondence to: T. Jauffrais (thierry.jauffrais@univ-angers.fr)

16  
17 **Abstract**

18 Some benthic foraminifera have the ability to incorporate functional chloroplasts from  
19 diatoms (kleptoplasty). Our objective was to investigate chloroplast functionality of two  
20 benthic foraminifera (*Haynesina germanica* and *Ammonia tepida*) exposed to different  
21 irradiance levels (0, 25, 70  $\mu\text{mol photon m}^{-2} \text{s}^{-1}$ ) using spectral reflectance, epifluorescence  
22 observations, oxygen evolution and pulse amplitude modulated (PAM) fluorometry  
23 [\(maximum photosystem II quantum efficiency \( \$F\_v/F\_m\$ \) and rapid light curves \(RLC\)\)](#). Our  
24 results clearly showed that *H. germanica* was capable of using its kleptoplasts for more than  
25 one week while *A. tepida* showed very limited kleptoplastic ability with maximum  
26 photosystem II quantum efficiency ( $F_v/F_m = 0.4$ ), much lower than *H. germanica* and  
27 decreasing to zero in only one day. Only *H. germanica* showed net oxygen production with a  
28 compensation point at 24  $\mu\text{mol photon m}^{-2} \text{s}^{-1}$  and a production up to 1000  $\text{pmol O}_2 \text{ cell}^{-1} \text{ day}^{-1}$   
29 at 300  $\mu\text{mol photon m}^{-2} \text{s}^{-1}$ . *Haynesina germanica*  $F_v/F_m$  slowly decreased from 0.65 to 0.55

Mis en forme : Police :Italique

1 in 7 days when kept in darkness; however, it quickly decreased to 0.2 under high light.  
2 Kleptoplast functional time was thus estimated between 11 and 21 days in darkness and  
3 between 7 and 8 days at high light. These results emphasize that studies about foraminifera  
4 kleptoplasty must take into account light history. Additionally, this study showed that the  
5 kleptoplasts are unlikely to be completely functional, thus requiring continuous chloroplast  
6 resupply from foraminifera food source. The advantages of keeping functional chloroplasts  
7 are discussed but more information is needed to better understand foraminifera feeding  
8 strategies.

## 9 1 Introduction

10 Benthic foraminifera colonize a wide variety of sediments from brackish waters to deep-sea  
11 environments and can be the dominant meiofauna in these ecosystems (Gooday 1986; Pascal  
12 et al. 2009). They may play a relevant role in the carbon cycle in sediments from deep sea  
13 (Moodley et al. 2002) to brackish environments (Thibault de Chanvalon et al. 2015). Their  
14 minor role in organic carbon cycling in aerobic sediments, compared to bacteria, contrasts  
15 with their strong contribution to anaerobic organic matter mineralisation (Geslin et al. 2011)  
16 and they can be responsible for up to 80% of benthic denitrification (Pina-Ochoa et al. 2010;  
17 Risgaard-Petersen et al. 2006).

18 Some benthic foraminiferal species are known to sequester chloroplasts from their food  
19 source and store them in their cytoplasm (Lopez 1979; Bernhard and Bowser, 1999) in a  
20 process known as kleptoplasty (Clark et al. 1990). A kleptoplast is thus a chloroplast,  
21 functional or not, that was "stolen" and integrated by an organism. Kleptoplastic foraminifera  
22 are found in intertidal sediments (e.g. *Haynesina*, *Elphidium* and *Xiphophaga*) (Lopez 1979;  
23 Correia and Lee 2000, 2002a, b; Goldstein et al. 2010; Pillet et al. 2011), low oxygenated  
24 aphotic environments (*Nonionella*, *Nonionellina*, *Stainforthia*) (Bernhard and Bowser 1999;  
25 Grzyski et al. 2002) and shallow-water sediments (*Bulimina elegantissima*) (Bernhard and  
26 Bowser, 1999). The role of chloroplasts sequestered by benthic foraminifera is poorly known  
27 and photosynthetic functions have only been studied in a few mudflat species (*Elphidium*  
28 *williamsoni*, *Elphidium excavatum* and *Haynesina germanica*) (Lopez 1979; Correia and Lee  
29 2000, 2002a, b; Cesbron et al. submitted). Amongst the deep-sea benthic foraminifer living in  
30 the aphotic zone, only *Nonionella stella* has been studied (Grzyski et al. 2002). The authors  
31 suggest that the sequestered chloroplasts in this species may play a role in the assimilation of  
32 inorganic nitrogen, even when light is absent. It has also been hypothesised that chloroplast

Supprimé: secondary

Supprimé: ¶

Supprimé: pers. comm.

1 retention may play a major role in foraminiferal survival when facing starvation periods or in  
2 anoxic environments (Cesbron [et al. submitted](#)). Under these conditions, kleptoplasts could  
3 potentially be used as a carbohydrate source, and participate in inorganic nitrogen  
4 assimilation (Falkowski and Raven 2007) or, when exposed to light, to produce oxygen  
5 needed in foraminiferal aerobic respiration (Lopez 1979).

Supprimé: pers. comm

6 Foraminifera pigment and plastid ultrastructure studies have shown that the chloroplasts are  
7 sequestered from their food source, i.e. mainly from diatoms (Lopez 1979; Knight and  
8 Mantoura 1985; Grzymiski [et al. 2002](#); Goldstein 2004). This was confirmed by experimental  
9 feeding studies (Correia and Lee 2002a; Austin [et al. 2005](#)) and by molecular analysis of  
10 kleptoplastic foraminifera from different environments (Pillet [et al. 2011](#), Tsuchiya [et al.](#)  
11 2015). Foraminifera from intertidal mudflat environments (e.g. *H. germanica*, *A. tepida*) feed  
12 mostly on pennate diatoms (Pillet [et al. 2011](#)) which are the dominant microalgae in intertidal  
13 mudflat sediments (MacIntyre [et al. 1996](#); Jesus [et al. 2009](#)). Furthermore, in this transitional  
14 coastal environments (e.g. estuaries, bays, lagoons) *A. tepida* and *H. germanica* are usually  
15 the dominant meiofauna species in West Atlantic French coast mudflats (Debenay [et al. 2000](#),  
16 2006; Morvan [et al. 2006](#); Bouchet [et al. 2009](#); Pascal [et al. 2009](#); Thibault de Chanvalon [et](#)  
17 [al. 2015](#)). Their vertical distribution in the sediment is characterised by a clear maximum  
18 density at the surface (Alve and Murray 2001; Bouchet [et al. 2009](#); Thibault de Chanvalon [et](#)  
19 [al. 2015](#)) with access to light, followed by a sharp decrease in the next two centimetres  
20 (Thibault de Chanvalon [et al.](#), 2015).

Supprimé: .

21 Foraminiferal kleptoplast [retention](#) times can vary from days to months (Lopez 1979; Lee [et](#)  
22 [al. 1988](#); Correia and Lee 2002b; Grzymiski [et al. 2002](#)). The source of this variation is poorly  
23 known but longer kleptoplast [retention](#) times were found in dark treatments (Lopez 1979;  
24 Correia and Lee 2002b), thus suggesting an effect of light exposure, similar to what is  
25 observed in kleptoplastic sacoglossans (Trench [et al. 1972](#); Clark [et al. 1990](#); Evertsen [et al.](#)  
26 2007; Vieira [et al. 2009](#)), possibly related to the absence of some components of the  
27 kleptoplast photosynthetic protein complexes in the host (Eberhard [et al. 2008](#)).

Supprimé: functional

Supprimé: functional

28 Most recent studies on kleptoplastic foraminifera focused on feeding, genetics and  
29 microscopic observation related to chloroplast acquisition (e.g., Austin [et al. 2005](#), Pillet [et al.](#)  
30 2011, Pillet and Pawlowski 2013). To our knowledge little is known about the effects of  
31 abiotic factors on photosynthetic efficiency of sequestered chloroplasts in benthic  
32 foraminifera, particularly on the effect of light intensity on kleptoplast functionality. Non-

1 invasive techniques are ideal to follow photosynthesis and some have already been used to  
2 study foraminifera respiration and photosynthesis, e.g. oxygen evolution by microelectrodes  
3 (Rink et al. 1998; Geslin et al. 2011) or  $^{14}\text{C}$  radiotracer (Lopez, 1979). Recently, pulse  
4 amplitude modulated (PAM) fluorometry has been used extensively in the study of  
5 kleptoplastic sacoglossans (Vieira et al. 2009; Costa et al. 2012; Jesus et al. 2010; Serodio et  
6 al. 2010; Curtis et al. 2013; Ventura et al. 2013). This non-invasive technique has the  
7 advantage of estimating relative electron transport rates (rETR) [using rapid light curves](#)  
8 [\(RLC\)](#) and photosystem II (PSII) maximum quantum efficiencies ( $F_v/F_m$ ) very quickly and  
9 without incubation periods. The latter parameter has been shown to be a good parameter to  
10 estimate PSII functionality (e.g. Vieira et al. 2009; Jesus et al. 2010; Serodio et al. 2010;  
11 Costa et al. 2012; Curtis et al. 2013; Ventura et al. 2013).

12 The objective of the current work was to investigate the effect of irradiance levels on  
13 photosynthetic efficiency and chloroplast functional times of two benthic foraminifera feeding  
14 in the same brackish areas, *H. germanica*, which is known to sequester chloroplasts and *A.*  
15 *tepida*, not known to sequester chloroplasts. These two species were exposed to different  
16 irradiance levels during one week and chloroplast efficiency was measured using  
17 epifluorescence, oxygen microsensors and PAM fluorometry.

18

## 19 **2 Materials and methods**

### 20 **2.1 Sampling**

21 *Haynesina germanica* and *A. tepida* were sampled in January 2015 in Bourgneuf Bay  
22 (47.013°N, 2.019°W), a coastal bay with a large mudflat situated south of the Loire estuary on  
23 the French west coast. In this area, all specimens of *A. tepida* belong to genotype T6 of  
24 Hayward et al. (2004) (Schweizer pers. comm.). In the field, a large amount (~20 kg) of the  
25 upper sediment layer (roughly first 5 mm) was sampled and sieved over 300 and 150  $\mu\text{m}$   
26 meshes using *in situ* sea-water. The 150  $\mu\text{m}$  fraction was collected in dark flasks and  
27 maintained overnight in the dark at 18°C in the laboratory. No additional food was added. In  
28 the following day, sediment with foraminifera was diluted with filtered (GF/C, 1.2  $\mu\text{m}$ ,  
29 Whatman) autoclaved sea-water (temperature: 18°C and salinity: 32) and *H. germanica* and  
30 *A. tepida* in healthy conditions (i.e. with cytoplasm inside the test) were collected with a brush  
31 using a stereomicroscope (Leica MZ 12.5). The selected specimens were rinsed several times

Supprimé: -

Supprimé: ±

Supprimé: P

1 using Bourgneuf bay filtered-autoclaved seawater to minimize bacterial and microalgal  
2 contamination.

### 3 2.2 Size and biovolume determination

4 Foraminifera test mean maximal elongation ( $\mu\text{m}$ , the length of the axes going from the last  
5 chamber to the other side of the test and passing by the umbilicus) was measured using a  
6 micrometer mounted on a Leica stereomicroscope (MZ 12.5). Mean foraminiferal volume  
7 was approximated with the equation of a half sphere, which is the best resembling geometric  
8 shape for *H. germanica* and *A. tepida* (Geslin et al. 2011). The cytoplasmic volume (or  
9 biovolume) was then estimated by assuming that the internal test volume corresponds to 75%  
10 of the total foraminiferal test volume (Hannah et al. 1994).

### 11 2.3 Spectral reflectance

12 Pigment spectral reflectance was measured non-invasively to determine and compare the  
13 relative pigment composition on 50 fresh specimens of *H. germanica*, on 50 fresh specimens  
14 of *A. tepida* and on a benthic diatom, as explained in Jesus et al. (2008). Concisely, a  
15 USB2000 (Ocean Optics, Dunedin, FL, USA) spectroradiometer with a VIS-NIR optical  
16 configuration controlled by OObase32 software (Ocean Optics B.V., Duiven, the  
17 Netherlands) was used. The spectroradiometer sensor was positioned so that the surface was  
18 always viewed from the nadir position. Foraminiferal reflectance spectra were calculated by  
19 dividing the upwelling spectral radiance from the foraminifera ( $L_u$ ) by the reflectance of a  
20 clean polystyrene plate ( $L_d$ ) for both of which the machine dark noise ( $D_n$ ) was subtracted  
21 (eq. 1).

$$22 \quad \rho = \frac{(L_u - D_n)}{(L_d - D_n)} \quad (\text{eq.1})$$

### 23 2.4 Image analysis

24 Foraminifera kleptoplast fluorescence was measured using epifluorescence microscopy  
25 ( $\times 200$ , Olympus Ax70 with Olympus U-RFL-T, excitation wave length 485 nm), Two Tif  
26 images ( $1232 \times 964 \text{ px}$ ) of each foraminifer were taken (one bright field photography and one  
27 epifluorescence photography) using LUCIA G<sup>TM</sup> software. The bright field photography was  
28 used to trace the contours of the foraminifer and an ImageJ macro was used to extract the

**Supprimé:** Pigment spectral reflectance was measured non-invasively to determine the relative pigment composition on 50 specimens of *H. germanica* and, on 50 specimens of *A. tepida* and a benthic diatom

**Supprimé:** Briefly

**Supprimé:** :

**Supprimé:** A

**Mis en forme :** Police :Non Italique

**Supprimé:** before and after the different light treatments

**Supprimé:** (n = 30 per condition)

1 mean pixel values of the corresponding epifluorescence photography. Higher mean pixel  
2 values corresponded to foraminifera emitting more fluorescence and thus, as a proxy, contain  
3 more chlorophyll. In a RGB image each channel contains pixels between 0 and 255 values.  
4 The majority of the information regarding chlorophyll fluorescence is encoded in the red  
5 channel, therefore the green and blue channel were discarded and only the red channel was  
6 kept. The images from the different treatments were directly comparable as all images were  
7 taken using the same acquisition settings. Thus, the mean red pixel values were used as a  
8 proxy for chlorophyll fluorescence.

## 9 2.5 Oxygen measurements

10 Oxygen was measured using advanced Clark type oxygen microelectrodes of 50 µm in  
11 diameter (Revsbech, 1989) (OXI50 - Unisense, Denmark). Electrodes were calibrated with a  
12 solution of sodium ascorbate at 0.1 M (0%) and with seawater saturated with oxygen by  
13 bubbling air (100%). Foraminiferal photosynthesis and oxygen respiration rates were  
14 measured following Høglund et al. (2008) and Geslin et al. (2011). Measurements were  
15 carried out in a micro-tube made from glass Pasteur pipette tips with an inner diameter of 1  
16 mm. The micro-tube was fixed to a small vial, filled with filtered autoclaved seawater from  
17 Bourgneuf Bay. The vial was placed in an aquarium with water kept at room temperature  
18 (18°C). A small brush was used to position a pool of 7 to 10 foraminifera in the glass micro-  
19 tube after removing air bubbles. Oxygen micro-profiles started at a distance of 200 µm above  
20 the foraminifers to avoid oxygen turbulences often observed around the foraminifers.  
21 Measurements were registered when the oxygen micro-profiles were stable; they were then  
22 repeated five time in the centre of the micro-tube, using 50 µm steps until 1000 µm away from  
23 the foraminifers (Geslin et al. 2011). The oxygen flux (J) was calculated using the first law of  
24 Fick:

$$25 \quad J = -D \times \frac{dC}{dx} \quad (\text{eq. 2})$$

26 Where D is the oxygen diffusion coefficient (cm<sup>2</sup> s<sup>-1</sup>) at experimental temperature (18°C) and  
27 salinity (32) (Li and Gregory, 1974), and dC/dx is the oxygen concentration gradient (pmol  
28 O<sub>2</sub> cm<sup>-1</sup>). The O<sub>2</sub> concentration gradients were calculated with the oxygen profiles and using  
29 the R<sup>2</sup> of the regression line to determine the best gradient. Total O<sub>2</sub> consumption and  
30 production rates were calculated as the product of O<sub>2</sub> fluxes by the surface area of the micro-

Supprimé: ¶

Supprimé: s

Supprimé: using

1 tube and subsequently divided by the foraminifera number to finally obtain the cell specific  
2 rate (pmol O<sub>2</sub> cell<sup>-1</sup> d<sup>-1</sup>) (Geslin et al. 2011).

### 3 2.6 Fluorescence

4 All pulse amplitude modulated fluorescence measurements were carried out with a Water  
5 PAM fluorometer (Walz, Germany) using a blue measuring light. Chloroplast functionality  
6 was estimated by monitoring PSII maximum quantum efficiency ( $F_v/F_m$ ) and by using P-I  
7 rapid light curves (RLC, e.g., Perkins et al. (2006)) parameters ( $\alpha$ , initial slope of the RLC at  
8 limiting irradiance;  $rETR_{max}$ , maximum relative electron transport rate;  $E_k$ , light saturation  
9 coefficient; and  $E_{opt}$ , optimum light) (Platt et al. 1980). Rapid light curves were constructed  
10 using eight incremental light steps (0, 4, 15, 20, 36, 48, 64, 90 and 128  $\mu\text{mol photons m}^{-2} \text{s}^{-1}$ ),  
11 each lasting 30 seconds. The PAM probe was set up on a stand holder at a 2 mm distance  
12 from a group of 10 foraminifera.

### 13 2.7 Experimental design

14 *Haynesina germanica*, a species known to sequester chloroplasts, were placed in plastic Petri  
15 dishes and starved during 7 days under three different light conditions: dark (D and Dark-  
16 RLC), low light (LL, 25  $\mu\text{mol photons m}^{-2} \text{s}^{-1}$ ) and high light (HL, 70  $\mu\text{mol photons m}^{-2} \text{s}^{-1}$ );  
17 whereas for comparison, *A. tepida*, a foraminifer not known to sequester chloroplasts was  
18 starved but only exposed to the dark condition. A short term experiment was thus carried out  
19 (7 days) to study the effect of light on healthy specimens rather than the effect of  
20 starvation. For each condition, ten specimens were used per replicate and three replicates per  
21 light treatment; furthermore all plastic Petri dishes were filled with Bourgneuf bay filtered-  
22 autoclaved seawater. This experiment was carried out in a thermo-regulated culture room at  
23 18° C, equipped with cool light fluorescent lamp (Lumix day light, L30W/865, Osram) and  
24 using a 14:10 h (Light:Dark) photoperiod. The distances between the light and the  
25 experimental conditions were assessed using a light-meter and a quantum sensor (ULM-500  
26 and MQS-B of Walz) to obtain the desirable light intensities. Concerning the dark condition,  
27 the Petri dishes were place in a box covered with aluminium foil.

28 *Haynesina germanica* kleptoplast fluorescence was measured using epifluorescence  
29 microscopy, as explain above, before and after the different light treatments. At the beginning  
30 of the experiment it was done on 30 independent specimens to assess the natural and initial

Mis en forme : Justifié

Supprimé: and by monitoring PSII maximum quantum efficiency ( $F_v/F_m$ )

Supprimé: the

Supprimé:  $F_v/F_m$  was measured daily at early afternoon, after a one-hour dark adaptation period.

Mis en forme : Police :Non Italique

Supprimé: on a 10:14 h (Light:Dark) cycle

Supprimé: ere

Supprimé: only

Supprimé: under

Supprimé: s

Mis en forme : Police :(Par défaut) Times New Roman

Mis en forme : Police :(Par défaut) Times New Roman

Mis en forme : Police :(Par défaut) Times New Roman

Supprimé: Each experimental condition was based on the monitoring of three different

Supprimé: ,

Supprimé: and containing 10 specimens per Petri dish

Supprimé: ,

Supprimé: has been

1 variation of *Haynesina germanica* kleptoplast fluorescence. At the end of the experiment, the  
2 measurement were done on all foraminifera exposed to the different light condition (a total of  
3 30 specimens per condition). This was also measured on *A. tepida*, but results are not  
4 presented because no chlorophyll fluorescence was observed at the end of the experiment.

5 *Haynesina germanica* and *A. tepida* oxygen production and consumption were measured at  
6 the beginning of the experiment on three independent replicates with 7 specimens in each  
7 replicate. Six different light steps were used to measure O<sub>2</sub> production (0, 25, 50, 100, 200  
8 and 300 μmol photons m<sup>-2</sup> s<sup>-1</sup>) for *H. germanica* and only two light steps (0 and 300 μmol  
9 photons m<sup>-2</sup> s<sup>-1</sup>) for *A. tepida*. Photosynthetic activity (P) data of *H. germanica* were fitted  
10 with a Haldane model, as modified by Papacek et al. (2010) and Marchetti et al. (2013) but  
11 without photoinhibition (eq. 3).

$$P(I) = \frac{Pm \times I}{I + Ek} - Rd \quad \text{(eq. 3)}$$

13 Where Pm is the maximum photosynthetic capacity (pmol O<sub>2</sub> cell<sup>-1</sup> d<sup>-1</sup>), I the photon flux  
14 density (μmol photons m<sup>-2</sup> s<sup>-1</sup>), Ek the half-saturation constant (μmol photons m<sup>-2</sup> s<sup>-1</sup>) and Rd  
15 the dark respiration, expressed as an oxygen consumption (pmol O<sub>2</sub> cell<sup>-1</sup> d<sup>-1</sup>). The initial  
16 slope of the P–I (Photosynthesis –Irradiance) curve at limiting irradiance α (pmol O<sub>2</sub> cell<sup>-1</sup>  
17 day<sup>-1</sup> (μmol photons m<sup>-2</sup> s<sup>-1</sup>)<sup>-1</sup>) and the compensation irradiance I<sub>c</sub> were calculated according  
18 to equations 4 and 5.

$$I_c = \frac{Ek \times Rd}{Pm - Rd} \quad \text{(eq. 4)}$$

$$\alpha = \frac{Rd}{I_c} \quad \text{(eq. 5)}$$

21 Oxygen measurements were repeated at 300 μmol photons m<sup>-2</sup> s<sup>-1</sup> and in the dark at the end of  
22 the experiment (7 days of incubation) for all different light treatments (D, LL, HL) using 10  
23 specimens, to assess their production or consumption of oxygen at these two light levels (300  
24 μmol photons m<sup>-2</sup> s<sup>-1</sup> and in the dark) in all treatments.

25 For All conditions (D, LL, HL and Dark-RLC) *F<sub>v</sub>/F<sub>m</sub>* were measured daily at early afternoon,  
26 after a one-hour dark adaptation period and were done in triplicate for each Petri Dish.

27 Rapid light curves were also carried out in all light treatments at the beginning and end of the  
28 experiment, after one-hour dark adaptation for the 2 tested species. Additionally, RLC were

**Supprimé: i**

**Supprimé: ¶**

*Haynesina germanica*, a species known to sequester chloroplasts, were placed in plastic Petri dishes and starved during 7 days under three different light conditions: dark (D and Dark-RLC, 3×10 foraminifera), low light (LL, 25 μmol photons m<sup>-2</sup> s<sup>-1</sup>, 3×10 foraminifera) and high light (HL, 70 μmol photons m<sup>-2</sup> s<sup>-1</sup>, 3×10 foraminifera) on a 10:14 h (Light:Dark) cycle; whereas for comparison, *A. tepida* (3×10 foraminifera), a foraminifer not known to sequester chloroplasts were placed in plastic Petri dishes and only starved under dark conditions.



1 carried out daily in an extra triplicate kept in the dark (Dark-RLC) throughout the duration of  
2 the experiment.

### 3 2.8 Statistical analysis

4 Data are expressed as mean  $\pm$  standard deviation (SD) when  $n = 3$  or standard error (SE)  
5 when  $n = 30$ . Statistical analyses consisted of a t-test to compare the foraminifera test mean  
6 maximal elongation, a non parametric test (Kruskal Wallis) to compare the mean chlorophyll  
7 fluorescence of the foraminifera exposed to the different experimental conditions and a  
8 multifactor (experimental conditions (D, LL, HL), irradiance ( $0-300 \mu\text{mol photons m}^{-2} \text{s}^{-1}$ ))  
9 analysis of variance (ANOVA) with a Fisher's LSD test to compare the respiration rates at the  
10 end of the experiment. Differences were considered significant at  $p < 0.05$ . Statistical analyses  
11 were carried out using the Statgraphics Centurion XV.I (StatPoint Technologies, Inc.)  
12 software.

## 13 3 Results

### 14 3.1 Size and biovolume

15 *Ammonia tepida* specimens were larger than *H. germanica* with a mean maximal elongation  
16 of  $390 \pm 42 \mu\text{m}$  (SD,  $n = 34$ ) and  $366 \pm 45 \mu\text{m}$  (SD,  $n = 122$ ), respectively ( $p < 0.01$ ,  $F_{121,33} =$   
17  $1.15$ ). This resulted in cytoplasmic biovolumes equal to  $1.20 \times 10^7 \pm 3.9 \times 10^6 \mu\text{m}^3$  (SD) and  
18  $1.01 \times 10^7 \pm 3.65 \times 10^6 \mu\text{m}^3$  (SD), respectively.

### 19 3.2 Chloroplast functionality

20 Fresh *Haynesina germanica* and *A. tepida* showed very different spectral reflectance  
21 signatures (Figure 1). *Haynesina germanica* showed a typical diatom spectral signature with  
22 high reflectance in the infrared region ( $>740 \text{ nm}$ ) and clear absorption features around 585,  
23 630 and 675 nm; the absorption feature around 675 nm correspond to the presence of  
24 chlorophyll *a*; the 585 nm feature is the result of fucoxanthin and the 630 nm absorption  
25 feature is the result of chlorophyll *c* (arrows, Figure 1). *Ammonia tepida* showed no obvious  
26 pigment absorption features apart from 430 nm (Figure 1).

27 Epifluorescence images showed a clear effect of the different light treatments (Dark, Low  
28 Light, High Light) on *H. germanica* chlorophyll fluorescence (Figure 2). Visual observations  
29 showed a clear decrease in chlorophyll fluorescence for the LL and HL treatments from the

Supprimé: the

Mis en forme : Police :Non Italique

Supprimé: <#>Oxygen measurements¶

Oxygen was measured at the beginning and end of the experiment using advanced Clark type oxygen microelectrodes of  $50 \mu\text{m}$  in diameter (Revsbech, 1989) (OXI50 - Unisense, Denmark). Electrodes were calibrated with a solution of sodium ascorbate at  $0.1 \text{ M}$  (0%) and with seawater saturated with oxygen by bubbling air (100%). Foraminiferal photosynthesis and oxygen respiration rates were measured following Høglund et al. (2008) and Geslin et al. (2011). Measurements were carried out in a micro-tube made from glass Pasteur pipette tips with an inner diameter of  $1 \text{ mm}$ . The micro-tube was fixed to a small vial, filled with filtered autoclaved seawater from Bourgneuf Bay. The vial was placed in an aquarium with water kept at room temperature ( $18^\circ\text{C}$ ). A small brush was used to position 7 to 10 foraminifera in the glass micro-tube after removing air bubbles. Oxygen micro-profiles started at a distance of  $200 \mu\text{m}$  above the foraminifers in the centre of the micro-tube and measurements were carried out in  $50 \mu\text{m}$  steps until  $1000 \mu\text{m}$  away from the foraminifers (Geslin et al. 2011). For each condition, three replicates were performed with different specimens. The oxygen flux ( $J$ ) was calculated using the first law of Fick: ¶

$$J = -D \times \frac{dC}{dx} \quad . \text{ (eq. 2) ¶}$$

Where  $D$  is the oxygen diffusion coefficient ( $\text{cm}^2 \text{s}^{-1}$ ) at experimental temperature ( $18^\circ\text{C}$ ) and salinity (32) (Li and Gregory, 1974), and  $dC/dx$  is the oxygen concentration gradient ( $\text{pmol O}_2 \text{ cm}^{-1}$ ). The  $\text{O}_2$  concentration gradients were calculated using the oxygen profiles. Total  $\text{O}_2$  consumption and production rates were calculated as the product of  $\text{O}_2$  fluxes by the surface area of the micro-tube and subsequently divided by the foraminifera number to finally obtain the cell specific rate ( $\text{pmol O}_2 \text{ cell}^{-1} \text{ d}^{-1}$ ) (Geslin et al. 2011). ¶ *Haynesina germanica* and *A. tepida* oxygen production and consumption were measured at the beginning of the experiment using 3 replicates of 7 foraminifera each. Six different light steps were used to measure  $\text{O}_2$  production ( $0$ ,  $25$ ,  $50$ ,  $100$ ,  $200$  and  $300 \mu\text{mol photons m}^{-2} \text{ s}^{-1}$ ) for *H. germanica* and two light steps ( $0$  and  $300 \mu\text{mol photons m}^{-2} \text{ s}^{-1}$ ) for *A. tepida*. Photosynthetic activity ( $P$ ) data of *H. germanica* were fitted with a Haldane model, as modified by ...

Supprimé: and SD = 42  $\mu\text{m}$

Supprimé: and SD = 45  $\mu\text{m}$

Supprimé: =  $3.9 \times 10^6 \mu\text{m}^3$

Supprimé: =  $3.65 \times 10^6 \mu\text{m}^3$

Mis en forme : Police :Non Italique

Supprimé: deep

Supprimé: 435,

Supprimé: s

Supprimé: 435 and

Supprimé: foraminiferal

Mis en forme : Police :Italique

1 beginning of the experiment (Figure 2A) to the end of a 7 day period of light exposure (Figure  
2 2C and 2D, respectively). Samples kept in the dark did not show an obvious decrease but  
3 showed a more patchy distribution compared to the beginning of the experiment (Figure 2B).  
4 This was confirmed by a non-parametric test (Kruskal Wallis) showing that the differences in  
5 chlorophyll *a* fluorescence were significant ( $p < 0.01$ ,  $Df = 3$ , Figure 3). It is also noteworthy  
6 to mention that there was a large individual variability within each treatment leading to large  
7 standard errors in spite of the number of replicates ( $n = 30$ ).

8 Oxygen measurements carried out at the beginning of the experiment (T0) differed  
9 considerably between the two species. *Ammonia tepida* did not show any net oxygen  
10 production although respiration rates measured at  $300 \mu\text{mol photons m}^{-2} \text{s}^{-1}$  were lower ( $2485$   
11  $\pm 245 \text{ pmol O}_2 \text{ cell}^{-1} \text{ d}^{-1}$ ) than the ones measured in the dark ( $3531 \pm 128 \text{ pmol O}_2 \text{ cell}^{-1} \text{ d}^{-1}$ )  
12 ( $F_{2,2} = 3.7$ ,  $p = 0.02$ ). *Haynesina germanica* showed lower dark respiration rates ( $1654 \pm 785$   
13  $\text{pmol O}_2 \text{ cell}^{-1} \text{ d}^{-1}$ ) and oxygen production quickly increased with irradiance, showing no  
14 evidence of photoinhibition within the light range used (Figure 4). Compensation irradiance  
15 ( $I_c$ ) was reached very quickly, as low as  $24 \mu\text{mol photons m}^{-2} \text{s}^{-1}$  (95% coefficient bound: 17-  
16  $30 \mu\text{mol photons m}^{-2} \text{s}^{-1}$ , values calculated from the fitted model eq.4) and the half-saturation  
17 constant ( $E_k$ ) was also reached at very low light levels, i.e. at  $17 \mu\text{mol photons m}^{-2} \text{s}^{-1}$ . No  
18 photoinhibition was observed under the experimental light conditions ( $0$  to  $300 \mu\text{mol photons}$   
19  $\text{m}^{-2} \text{s}^{-1}$ ), which resulted in an estimation of  $\sim 2800 \text{ pmol O}_2 \text{ cell}^{-1} \text{ d}^{-1}$  for maximum  
20 photosynthetic capacity. The P-I curve initial slope at limiting irradiance ( $\alpha$ ) was estimated at  
21  $70 \text{ pmol O}_2 \text{ cell}^{-1} \text{ d}^{-1} (\mu\text{mol photons m}^{-2} \text{s}^{-1})^{-1}$  (95% coefficient bound: 58-88).

22 Oxygen measurements carried out at the end of the experiment (T7) showed significant  
23 different dark and light respiration rates, with light respiration being lower than dark  
24 respiration but not reaching net oxygen production rates (D, LL, HL) (Table 1). Moreover,  
25 respiration rates were different between conditions ( $p < 0.001$ ), with significantly lower  
26 respiration rates of specimens incubated under High Light conditions than those under Dark  
27 and Low Light conditions ( $p < 0.05$ , Fisher's LSD test).

28 PAM fluorescence rapid light curve (RLC) parameters ( $\alpha$ ,  $rETR_{\text{max}}$ ,  $E_k$  and  $E_{\text{opt}}$ ) showed  
29 significant differences between foraminiferal species and over the duration of the experiment  
30 (Figures 5 and 6). Highest  $rETR_{\text{max}}$ ,  $\alpha$  and  $E_{\text{opt}}$  were always observed in *H. germanica*.  
31 After only one starvation day *A. tepida* RLC parameters dropped to zero or close to zero.  
32 Contrastively, *H. germanica* RLC parameters showed a slow decrease throughout the

1 experiment (Figures 5 and 6) with  $rETR_{max}$  and  $\alpha$  decreasing from 6 to 4 and 0.22 to 0.15,  
2 respectively (Figures 6A and B). The parameters  $E_k$  and  $E_{opt}$  stayed constant over the 7 days  
3 of the experiment, with values oscillating around 30 and 90, respectively (Figures 6C and D).  
4 PSII maximum quantum yields ( $F_v/F_m$ ) were clearly affected by light and time (Figure 7).  
5 Both species showed high initial  $F_v/F_m$  values, i.e.  $> 0.6$  and  $0.4$  for *H. germanica* and *A.*  
6 *tepida*, respectively (Figure 7). However, while *A. tepida*  $F_v/F_m$  values quickly decreased to  
7 zero after only one starvation day, *H. germanica* exhibited a large variability between light  
8 conditions (D, LL, HL) throughout the duration of the experiment (Figure 7); decreasing from  
9  $0.65$  to  $0.55$  in darkness (D), from  $0.65$  to  $0.35$  under low light (LL) conditions and from  $0.65$   
10 to  $0.20$  under high light (HL). Using these  $F_v/F_m$  decreases, *H. germanica* kleptoplast  
11 functional times were estimated between 11-21 days in the dark (D), 9-12 days in low light  
12 (LL) and 7-8 days in high light (HL); depending if an exponential or linear model was  
13 applied. *Ammonia tepida* chloroplast functional times were estimated between 1-2 days  
14 (exponential and linear model, respectively) and light exposure reduced the functional time to  
15 less than one day (data not shown).

16

## 17 4 Discussion

### 18 4.1 Chloroplast functionality

19 Our results clearly show that only *H. germanica* was capable of carrying out net  
20 photosynthesis. *Haynesina germanica* had typical diatom reflectance spectra (Figure 1),  
21 showing the three major diatom pigment absorption features: chlorophyll *a*, chlorophyll *c*, and  
22 fucoxanthin (Meleder et al. 2003; Jesus et al. 2008; Kazemipour et al. 2012; Meleder et al.  
23 2013). Conversely, in *A. tepida* these absorption features were not detected, suggesting that  
24 diatom pigments ingested by this species were quickly digested and degraded to a degree  
25 where they were no longer detected by spectral reflectance measurements. These non-  
26 destructive reflectance measurements are thus in accordance with other studies on benthic  
27 foraminifera pigments by HPLC showing that *H. germanica* feed on benthic diatoms (Knight  
28 and Mantoura, 1985). Similarly, Knight and Mantoura (1985) also detected higher  
29 concentrations and less degraded diatom pigments in *H. germanica* than in *A. tepida*.

30 Furthermore, *H. germanica* has the ability to produce oxygen from low to relatively high  
31 irradiance, as shown by the low compensation point ( $I_c$ ) of  $24 \mu\text{mol photons m}^{-2} \text{s}^{-1}$  and the

Supprimé: n

Supprimé: capture photons and

Supprimé: 25

1 high onset of light saturation ( $>300 \mu\text{mol photons m}^{-2} \text{ s}^{-1}$ ) (Figure 4). Thus, *H. germanica*  
2 seems to be well adapted to cope with the high light variability observed in intertidal  
3 sediments that can range from very high irradiance levels ( $>1000 \mu\text{mol photons m}^{-2} \text{ s}^{-1}$ ) at the  
4 surface of the sediment during low tide to very low levels within the sediment matrix or  
5 during high tide in turbid mudflat waters. *Ammonia tepida* was found to carry out aerobic  
6 respiration, but respiration rates measured at  $300 \mu\text{mol photons m}^{-2} \text{ s}^{-1}$  were lower than those  
7 measured in the dark. We thus suppose that in *A. tepida* oxygen production by ingested  
8 diatom or chloroplasts might be possible, provided that this species is constantly supplied  
9 with fresh diatoms. However, another possibility to explain this reduction in oxygen  
10 consumption could be a decrease of its metabolism or activity under light exposure. The light  
11 and dark oxygen production or consumption values measured for both species are in  
12 accordance with previous studies (Geslin et al. 2011).

13 According to Lopez (1979), measured oxygen data can be used to estimate *H. germanica*  
14 carbon fixation rates. Thus, using  $1000 \text{ pmol O}_2 \text{ cell}^{-1} \text{ d}^{-1}$  at  $300 \mu\text{mol photons m}^{-2} \text{ s}^{-1}$ ,  $\sim 200$  to  
15  $4000 \text{ cells per } 50 \text{ cm}^3$  in the top  $0.5 \text{ cm}$  (Morvan et al. 2006; Bouchet et al. 2007) and  
16 assuming that photosynthesis produced one mol  $\text{O}_2$  per mol of C fixed, *H. germanica* primary  
17 production would be between  $1.8 \times 10^{-5}$  and  $4.0 \times 10^{-4} \text{ mol C m}^{-2} \text{ d}^{-1}$ . This is a very low value  
18 compared to microphytobenthos primary production in Atlantic mudflat ecosystems, which  
19 usually range from  $1.5$  to  $5.9 \text{ mol C m}^{-2} \text{ d}^{-1}$  (e.g. Brotas and Catarino 1995, reviewed in  
20 MacIntyre et al. 1996). The estimated values represent thus less than  $0.1\%$  of  
21 microphytobenthos fixated carbon and are in the same range of values than what has been  
22 described by Lopez (1979) using  $^{14}\text{C}$  radioactive tracers. These results should be interpreted  
23 with caution because a wide variety of factors probably affect *H. germanica in situ* primary  
24 production, e.g. diatom availability, kleptoplast densities, nutrient supply, light exposure, sea  
25 water turbidity and migration capability are all factors that can potentially affect *H.*  
26 *germanica* kleptoplast functionality. Nevertheless, although carbon fixation seems not to be  
27 relevant at a global scale, the oxygen production could be important at a microscale and  
28 relevant in local mineralization processes in/on mudflat sediments (e.g. iron, ammonium,  
29 manganese).

30 At sampling time (T0) *H. germanica* rETR and  $F_v/F_m$  values were similar to  
31 microphytobenthic species (i.e.  $F_v/F_m > 0.65$ ) (Perkins et al. 2001), suggesting that the  
32 kleptoplast PSII and electron transport chain were not much affected after incorporation in the

Mis en forme : Non Exposant/ Indice

Supprimé: little

1 foraminifers' cytoplasm. In contrast, *A. tepida* *Fv/Fm* and RLC parameters were already  
2 much lower on the sampling day and quickly decreased to almost zero within 24 hours,  
3 suggesting that plastids were not stable inside the *A. tepida* cytoplasm. Complete diatoms  
4 inside *A. tepida* were already observed in feeding studies (Le Kieffre, pers. com), this low  
5 *Fv/Fm* value might thus come from recently ingested diatoms by *A. tepida*. *Fv/Fm* has  
6 previously been used to determine kleptoplast functional times and to follow decrease in  
7 kleptoplast efficiency in other kleptoplastic organisms, e.g. the sea slug *Elysia viridis* (Vieira  
8 et al. 2009). *Fv/Fm* measurements carried out on *H. germanica* at different light conditions  
9 showed that light had a significant effect on the estimation of kleptoplast functional time, with  
10 the longest functional time estimated at 21 days for dark condition. This time frame would  
11 qualify *H. germanica* as a long term kleptoplast retention species (Clark et al. 1990);  
12 however, our seven days estimation for the high light treatment would place *H. germanica* in  
13 the medium-term retention group. This clearly shows that light exposure has an important  
14 effect on this species kleptoplast functionality. Concerning *A. tepida*, the short dark diatom or  
15 chloroplast functional time (<2 days) places this species directly in the short or medium-term  
16 retention group.

17 Additionally, *H. germanica* kept in darkness showed a slow decrease of the RLC parameters,  
18  $\alpha$  and  $rETR_{max}$ , throughout the seven experimental days; this decrease is likely related to  
19 overall degradation of the light-harvesting complexes and of other components of the  
20 photosynthetic apparatus, which gradually induced a reduction of light harvesting efficiency  
21 and of carbon metabolism. This decrease was much amplified in low and high irradiance and  
22 it should be pointed out that the actual light level of the HL treatment (i.e.  $70 \mu\text{mol photons m}^{-2} \text{s}^{-1}$ )  
23 is very low as compared to irradiances in their natural environment, which are easily  
24 going above  $1000 \mu\text{mol photons m}^{-2} \text{s}^{-1}$ , showing that the foraminifera kleptoplasts lack the  
25 high photoregulation capacity exhibited by the benthic diatoms that they feed upon  
26 (Cartaxana et al. 2013). This is consistent with the observation at the end of the experiment  
27 that no net oxygen production was occurring under the different light conditions.  
28 Nevertheless, a small difference was still found between dark and light respiration (Table 1),  
29 suggesting that some oxygen production was still occurring but it was not sufficient to  
30 compensate for the respiration oxygen consumption. We also noticed that the respiration was  
31 higher in the foraminifera maintained in low light and dark conditions in comparison to the  
32 high light foraminifera. In the line of the lower *Fv/Fm* values observed, this suggests that  
33 kleptoplasts and possibly other metabolic pathways might have been damaged by the excess

1 of light. Clearly, in *H. germanica* light exposure had a strong effect on PSII maximum  
2 quantum efficiency and on the retention of functional kleptoplasts (Figure 7), which can  
3 explain the absence of net oxygen production after the 7 days of the experiments. Comparable  
4 results for *H. germanica* were also obtained by counting the number of chloroplasts over time  
5 with cells exposed or not to light (Lopez 1979). One of the most probable explanations for the  
6 observed *Fv/Fm* decrease is the gradual inactivation of the protein D1 in PSII reaction  
7 centres. This protein is an essential component in the electron transport chain and its turnover  
8 rate is frequently the limiting factor in PSII repair rates (reviewed in Campbell and Tyystjärvi  
9 2012). Normally, protein D1 is encoded in the chloroplast and is rapidly degraded and  
10 resynthesized under light exposure with a turnover correlated to irradiance (Tyystjärvi and  
11 Aro 1996). However, although D1 is encoded by the chloroplast genome, its synthesis and  
12 concomitant PSII recovery require further proteins that are encoded by the algal nuclear  
13 genome (Yamaguchi et al. 2005). Thus, when D1 turnover is impaired it will induce an *Fv/Fm*  
14 decrease correlated to irradiance (Tyystjärvi and Aro 1996) consistent to what was observed  
15 in the present study. In another deep sea benthic species (*Nonionella stella*) the D1 and other  
16 plastid proteins (RuBisCO and FCP complex) were still present in the foraminifer one year  
17 after sampling (Grzymski et al. 2002). This shows that some foraminifera can retain both  
18 nuclear (FCP) and chloroplast (D1 and RuBisCO) encoded proteins. However, contrary to *H.*  
19 *germanica*, *N. stella* lives in deeper environments never exposed to light and thus is unlikely  
20 to carry out oxygenic photosynthesis (Grzymski et al. 2002). This fundamental difference  
21 could explain why kleptoplast functional times are much longer in *N. stella*, reaching up to  
22 one year in specimens kept in darkness (Grzymski et al. 2002). On the other hand, it has been  
23 shown that isolated chloroplasts are able to function for several months in Sacoglossan sea  
24 slugs provided with air and light in aquaria (Green et al. 2001; Rumpho et al. 2001), which  
25 demonstrates the existence of interactions between the kleptoplast and the host genomes,  
26 and/or of mechanisms facilitating and supporting such long-lasting associations. In *H.*  
27 *germanica* exposed to HL it is also possible that reactive oxygen species (ROS) production  
28 rates of the sequestered chloroplasts might exceed the foraminifera capacity to eliminate those  
29 ROS, thus inducing permanent damage to the foraminifera. This ROS production could also  
30 eventually damage the kleptoplasts resulting in higher kleptoplast degradation rates,

Supprimé :

Mis en forme : Anglais (États-Unis)

## 4.2 Possible advantages of kleptoplasty for intertidal benthic foraminifera

Much is still unknown about the relationship between kleptoplastic benthic foraminifera and their sequestered chloroplasts. The relevance of the photosynthetic metabolism compared to predation or organic matter assimilation is unknown; however, it would be of great interest to understand the kleptoplast role in the foraminiferal total energy budget. Oxygenic photosynthesis comprises multiple reactions leading to the transformation of inorganic carbon to carbohydrates. However, to produce these carbohydrates all the light driven reactions have to be carried out, as well as the Calvin cycle reactions. With fresh kleptoplasts this hypothesis seems possible (e.g. Lopez 1979), especially if the plastid proteins are still present and functional. However, we showed that the maximum quantum efficiency of the PSII decreased quickly under light exposure, suggesting that substantial direct carbohydrate production is unlikely without constant chloroplast replacement. Conversely, the production of intermediate photosynthetic products such as adenosine triphosphate (ATP) and nicotinamide adenine dinucleotide phosphate (NADPH) could be possible and would be of metabolic value for the foraminifera. It is also possible that *in situ* the foraminifera have better photoregulation capacities. Not only they will have easy access to fresh diatom chloroplasts, as *H. germanica* is mainly living in the first few mm of the superficial sediment (Alve and Murray 2001, Thibault de Chanvalon et al. 2015), but they will also have the possibility of migrating within the sediment (Gross 2000) using this behavioural feature to enhance their photoregulation capacity, similarly to what is observed in benthic diatoms from microphytobenthic biofilms (e.g. Jesus et al. 2006; Mouget et al. 2008; Perkins et al. 2010). However, below the photic limit (max 2 to 3 mm in estuarine sediments (reviewed in MacIntyre et al. 1996, Cartaxana et al. 2011)) it is unlikely that oxygenic photosynthesis will occur, even if live *H. germanica* are also found below this limit (Thibault de Chanvalon et al. 2015, [Cesbron et al. in press](#)).

## 5 Conclusion

Comparing *H. germanica* with *A. tepida* showed that the former species potentially has the capacity of retaining functional kleptoplasts up to 21 days, much longer than *A. tepida* that showed almost no PSII activity after 24 hours. Nevertheless, the capacity of *H. germanica* to keep functional kleptoplasts was significantly decreased by exposing it even to low irradiance levels, which resulted in low *Fv/Fm* values and decreased oxygen production. This shows clearly that in our experimental conditions, *H. germanica* had reduced photoregulation capacities. These results emphasize that studies on kleptoplast photophysiology of benthic

**Supprimé:** and

**Supprimé:** Using kleptoplasts, *H. germanica*, like other kleptoplastic organisms (e.g. *Elysia viridis* (Teugels et al. 2008)), is also theoretically capable of assimilating inorganic nitrogen via the glutamine synthetase and glutamate 2-oxo-glutarate aminotransferase (GS-GOGAT) pathways to produce glutamate and glutamine after the successive reduction of nitrate to nitrite and nitrite to ammonia or directly through ammonium uptake (Zehr and Falkowski 1988). However, the first reduction occurs in the diatom cytoplasm via the enzyme nitrate reductase (NR) and not inside the chloroplast. It is not known if *H. germanica* has this enzyme but it is present in *N. stella* (Grzymiski et al. 2002). Interestingly, nitrogen (i.e. nitrite and ammonium) assimilation by sacoglossans (e.g. *Elysia viridis*) was observed under light and dark conditions with significantly higher nitrogen assimilation observed under light condition (Teugels et al. 2008). The uptake of ammonium and nitrite are light dependent as their relevant enzymes require kleptoplast electron donors (NiR and GOGAT); i.e. reduced ferredoxin formed in the photosynthetic electron transport chain are used as electron donors in the reaction involving the nitrite reductase [NiR]. Furthermore, the GS metabolic reaction is ATP-dependent, and gene expression of some key enzymes (NiR, GS and GOGAT) is light regulated (Grossman and Takahashi 2001). This suggests that kleptoplasts might also have an added value in providing extra nitrogen source to metabolic pathways in foraminifera under light exposure and also possibly over short periods under dark conditions. It is also noteworthy that ammonium incorporation might take place through the glutamine dehydrogenase (GDH) pathway in the mitochondria that converts glutamate to  $\alpha$ -ketoglutarate, which can subsequently be assimilated in the kleptoplast via the GOGAT pathway (Teugels et al. 2008).¶  
Diatoms are also known to assimilate organic nitrogen (Antia et al. 1991), to use their ornithine-urea cycle for anaplerotic carbon fixation into nitrogenous compounds (Allen et al. 2012) and some of the benthic species present on mudflats are also able to assimilate organic carbon (Admiraal and Peletier 1979). Apparently some benthic diatoms can alternate between an auto- or heterotrophic metabolism in function of the environment. Analysing the kleptoplast DNA would provide interesting data to determine if foraminifera are capable of selecting facultative heterotrophic diatoms to improve their ability to assimilate dissolved organic compounds. Finally, another possible added value of incorporating kleptoplasts is the possibility of using them as an energy stock to be digested during food-impooverished periods particularly when foraminifera are transported below the photic zone of the sediment by macrofaunal bioturbation.¶

1 foraminifera must be interpreted with care, as results are strongly influenced by the  
2 foraminiferal light history before incubation. Additionally, this study shows that the cellular  
3 machinery necessary for chloroplast maintenance is unlikely to be completely functional,  
4 suggesting that *H. germanica* has to continuously renew its chloroplasts to keep them  
5 functional. We hypothesize that kleptoplasts might have an added value by providing extra  
6 carbon and fueling nitrogen metabolic pathways to foraminifera, mainly under light exposure,  
7 but also as energy stock to be digested during food impoverished periods, in dark or light  
8 conditions.

### 9 Acknowledgements

10 This study is part of the EC2CO project “FORChlo” supported by the CNRS. This study is  
11 strongly supported by the Region Pays de la Loire (Post-doc position of the first author and  
12 “COSELMAR” and “Fresco” projects).

### 13 References

14 Alve, E. and Murray, J.W.: Temporal variability in vertical distributions of live (stained)  
15 intertidal foraminifera, southern England. *J. Foraminifer. Res.* 31: 12-24, 2001.

16 Austin, H.A., Austin, W.E. and Paterson, D.M.: Extracellular cracking and content removal of  
17 the benthic diatom *Pleurosigma angulatum* (Quekett) by the benthic foraminifera *Haynesina*  
18 *germanica* (Ehrenberg). *Mar. Micropaleontol.* 57: 68-73, 2005.

19 Bernhard, J.M. and Bowser, S.S.: Benthic foraminifera of dysoxic sediments: chloroplast  
20 sequestration and functional morphology. *Earth Sci. Rev.* 46: 149-165, 1999.

21 Bouchet, V.M.P., Debenay, J.-P., Sauriau, P.-G., Radford-Knoery, J. and Soletchnik, P.:  
22 Effects of short-term environmental disturbances on living benthic foraminifera during the  
23 Pacific oyster summer mortality in the Marennes-Oleron Bay (France). *Mar. Environ. Res.*  
24 64: 358-383, 2007.

25 Bouchet, V.M.P., Sauriau, P.-G., Debenay, J.-P., Mermillod-Blondin, F., Schmidt, S.,  
26 Amiard, J.-C. and Dupas, B.: Influence of the mode of macrofauna-mediated bioturbation on  
27 the vertical distribution of living benthic foraminifera: First insight from axial  
28 tomodensitometry. *J. Exp. Mar. Biol. Ecol.* 371, 20-33, 2009.

29 Brotas, V. and Catarino, F.: Microphytobenthos primary production of Tagus estuary  
30 intertidal flats (Portugal). *Neth. J. Aquat. Ecol.* 29: 333-339, 1995.

**Supprimé:** Admiraal, W. and Peletier, H.: Influence of organic compounds and light limitation on the growth rate of estuarine benthic diatoms. *Br. Phycological J.* 14: 197-206, 1979.¶  
Allen, A. E., Dupont, C. L., Obornik, M., Horak, A., Nunes-Nesi, A., McCrow, J. P., Zheng, H., Johnson, D. A., Hu, H. H., Fernie, A. R., and Bowler, C.: Evolution and metabolic significance of the urea cycle in photosynthetic diatoms, *Nature*, 473, 203-207, 2011.¶

**Supprimé:** Antia, N.J., Harrison, P.J. and Oliveira, L.: The role of dissolved organic nitrogen in phytoplankton nutrition, cell biology and ecology. *Phycologia*. 30: 1-89, 1991.¶



1 Cartaxana, P., Domingues, N., Cruz, S., Jesus, B., Laviale, M., Serôdio, J. and Marques da  
2 Silva, J.: Photoinhibition in benthic diatom assemblages under light stress. *Aqua. Microb.*  
3 *Ecol.* 70: 87-92, 2013.

4 Cartaxana, P., Ruivo, M., Hubas, C., Davidson, I., Serôdio, J. and Jesus, B.: Physiological  
5 versus behavioral photoprotection in intertidal epipelagic and epipsammic benthic diatom  
6 communities. *J. Exp. Mar. Biol. Ecol.* 405: 120-127, 2011.

7 Campbell, D. A., and Tyystjarvi, E.: Parameterization of photosystem II photoinactivation  
8 and repair, *Biochim. Biophys. Acta-Bioenerg.*, 1817, 258-265, 2012.

9 Cesbron F., Geslin E., Le Kieffre C., Jauffrais T., Nardelli M.P., Langlet D., Mabillean G.,  
10 Jorissen, F., Jézéquel, D., Metzger E., 201X. Sequestered chloroplasts in the benthic  
11 foraminifer *Haynesina germanica*: cellular organization, oxygen fluxes and potential  
12 ecological implications. *J. Foram. Res.* Submitted

13 Cesbron F., Geslin E., Jorissen F.J., Delgard M.L., Charrieau L., Deflandre B., Jézéquel D.,  
14 Anschutz P. and Metzger E.: Vertical distribution and respiration rates of benthic  
15 foraminifera: Contribution to aerobic remineralization in intertidal mudflats covered by  
16 *Zostera noltei* meadows. *Estuar. Coast. Shelf Sci.* In press

17 Clark, K.B., Jensen, K.R. and Stirts, H.M.: Survey for functional kleptoplasty among West  
18 Atlantic Ascoglossa (=Sacoglossa) (Mollusca: Opisthobranchia). *Veliger.* 33: 339-345, 1990.

19 Correia, M.J. and Lee, J.J.: Chloroplast retention by *Elphidium excavatum* (Terquem). Is it a  
20 selective process? *Symbiosis.* 29: 343-355, 2000.

21 Correia, M.J. and Lee, J.J.: Fine structure of the plastids retained by the foraminifer  
22 *Elphidium excavatum* (Terquem). *Symbiosis.* 32: 15-26, 2002a.

23 Correia, M.J. and Lee, J.J.: How long do the plastids retained by *Elphidium excavatum*  
24 (Terquem) last in their host? *Symbiosis.* 32: 27-37, 2002b.

25 Costa, J., Gimenez-Casaldueiro, F., Melo, R., Jesus, B.: Colour morphotypes of *Elysia timida*  
26 (Sacoglossa, Gastropoda) are determined by light acclimation in food algae. *Aqua. Biol.* 17:  
27 81-89, 2012.

28 Curtis, N.E., Middlebrooks, M.L., Schwartz, J.A. and Pierce, S.K.: PAM analysis of 3  
29 sacoglossan species reveals differences in photosynthetic function and chloroplast longevity.  
30 *Integr. Comp. Biol.* 53: 272-272, 2013.

Mis en forme : Police :Italique

Mis en forme : Police :Italique

1 Debenay, J.P., Bicchi, E., Goubert, E. and du Chatelet, E.A.: Spatio-temporal distribution of  
2 benthic foraminifera in relation to estuarine dynamics (Vie estuary, Vendee, W France).  
3 Estuar. Coast. Shelf Sci. 67: 181-197, 2006.

4 Debenay, J.-P., Guillou, J.-J., Redois, F. and Geslin, E.: Distribution trends of foraminiferal  
5 assemblages in paralic environments. In: Martin, R.E. (Ed.), Environmental  
6 Micropaleontology. Springer US, pp. 39-67, 2000.

7 Eberhard, S., Finazzi, G. and Wollman, F.-A.: The dynamics of photosynthesis, Annu. Rev.  
8 Genet., pp. 463-515, 2008.

9 Evertsen, J., Burghardt, I., Johnsen, G. and Wagele, H.: Retention of functional chloroplasts  
10 in some sacoglossans from the Indo-Pacific and Mediterranean. Mar. Biol. 151: 2159-2166,  
11 2007.

12 Falkowski, P.G. and Raven, J.A.: Aquatic photosynthesis, second ed. Princeton University  
13 Press, 2007.

14 Geslin, E., Risgaard-Petersen, N., Lombard, F., Metzger, E., Langlet, D. and Jorissen, F.:  
15 Oxygen respiration rates of benthic foraminifera as measured with oxygen microsensors. J.  
16 Exp. Mar. Biol. Ecol. 396: 108-114, 2011.

17 Goldstein, S.T., Bernhard, J.M. and Richardson, E.A. Chloroplast sequestration in the  
18 foraminifer *Haynesina germanica*: Application of high pressure freezing and freeze  
19 substitution. Microsc. Microanal. 10: 1458-1459, 2004.

20 Goldstein, S.T., Habura, A., Richardson, E.A. and Bowser, S.S.: *Xiphophaga minuta*, and *X.*  
21 *allominuta*, nov. gen., nov. spp., new monothalamid Foraminifera from coastal Georgia  
22 (USA): cryptic species, gametogenesis, and an unusual form of chloroplast sequestration. J.  
23 Foraminifer. Res. 40: 3-15, 2010.

24 Gooday, A.J.: Meiofaunal foraminiferans from the bathyal Porcupine Seabight (northeast  
25 Atlantic): size structure, standing stock, taxonomy composition, species diversity and vertical  
26 distribution in the sediment. Deep-Sea Res. Part I-Oceanogr. Res. Pap. 33: 1345-1373, 1986.

27 Green B.J., Li W.-Y., Manhart J.R., Fox T.C., Summer E.J., Kennedy R.A., Pierce S.K. and  
28 Rumpho M.E.: Mollusc-algal chloroplast endosymbiosis. Photosynthesis, thylakoid protein  
29 maintenance, and chloroplast gene expression continue for many months in the absence of the  
30 algal nucleus. Plant Physiol. 124: 331-342, 2001.

1 Gross, O.: Influence of temperature, oxygen and food availability on the migrational activity  
2 of bathyal benthic foraminifera: evidence by microcosm experiments. *Hydrobiol.* 426: 123-  
3 137, 2000.

4 Grzyski, J., Schofield, O.M., Falkowski, P.G. and Bernhard, J.M.: The function of plastids  
5 in the deep-sea benthic foraminifer, *Nonionella stella*. *Limnol. Oceanogr.* 47: 1569-1580,  
6 2002.

7 Hannah, F., Rogerson, A. and Laybournparry, J.: Respiration rates and biovolumes of  
8 common benthic foraminifera (Protozoa). *J. Mar. Biol. Assoc. U.K.* 74: 301-312, 1994.

9 Hayward, B.W., Holzmann, M., Grenfell, H.R., Pawlowski, J. and Triggs, C.M.:  
10 Morphological distinction of molecular types in *Ammonia* - towards a taxonomic revision of  
11 the world's most commonly misidentified foraminifera. *Mar. Micropal.* 50: 237-271, 2004.

12 Hogslund, S., Revsbech, N.P., Cedhagen, T., Nielsen, L.P., and Gallardo, V.A.:  
13 Denitrification, nitrate turnover, and aerobic respiration by benthic foraminiferans in the  
14 oxygen minimum zone off Chile. *J. Exp. Mar. Biol. Ecol.* 359: 85-91, 2008.

15 Jesus, B., Brotas, V., Ribeiro, L., Mendes, C.R., Cartaxana, P. and Paterson, D.M.:  
16 Adaptations of microphytobenthos assemblages to sediment type and tidal position. *Cont.*  
17 *Shelf Res.* 29: 1624-1634, 2009.

18 Jesus, B., Mouget, J.-L. and Perkins, R.G.: Detection of diatom xanthophyll cycle using  
19 spectral reflectance. *J. Phycol.* 44: 1349-1359, 2008.

20 Jesus, B., Perkins, R.G., Consalvey, M., Brotas, V. and Paterson, D.M.: Effects of vertical  
21 migrations by benthic microalgae on fluorescence measurements of photophysiology. *Mar.*  
22 *Ecol. Prog. Ser.* 315: 55-66, 2006.

23 Jesus, B., Ventura, P. and Calado, G.: Behaviour and a functional xanthophyll cycle enhance  
24 photo-regulation mechanisms in the solar-powered sea slug *Elysia timida* (Risso, 1818). *J.*  
25 *Exp. Mar. Biol. Ecol.* 395: 98-105, 2010.

26 Kazempour, F., Launeau, P. and Méléder, V.: Microphytobenthos biomass mapping using the  
27 optical model of diatom biofilms: Application to hyperspectral images of Bourgneuf Bay.  
28 *Remote Sens. Environ.* 127: 1-13, 2012.

**Supprimé:** Grossman, A. and Takahashi, H.: Macronutrient utilization by photosynthetic eukaryotes and the fabric of interactions. *Annu. Rev. Plant Physiol. Plant Molec. Biol.* 52: 163-210, 2001.¶

1 Knight, R. and Mantoura, R.F.C.: Chlorophyll and carotenoid pigments in foraminifera and  
2 their symbiotic algae: analysis by high performance liquid chromatography Mar. Ecol. Prog.  
3 Ser. 23: 241-249, 1985.

4 Lee, J.J., Lanners, E. and Ter Kuile, B.: The retention of chloroplasts by the foraminifera  
5 *Elphidium crispum*. Symbiosis. 5: 45-60, 1988.

6 Li, Y.H. and Gregory, S.: Diffusion of ions in sea-water and deep-sea sediments. Geochim.  
7 Cosmochim. Acta. 38: 703-714, 1974.

8 Lopez, E.: Algal chloroplasts in the protoplasm of three species of benthic foraminifera:  
9 taxonomic affinity, viability and persistence. Mar. Biol. 53: 201-211, 1979.

10 MacIntyre, H.L., Geider, R.J. and Miller, D.C.: Microphytobenthos: The ecological role of the  
11 "secret garden" of unvegetated, shallow-water marine habitats .1. Distribution, abundance and  
12 primary production. Estuaries. 19: 186-201, 1996.

13 Marchetti, J., Bougaran, G., Jauffrais, T., Lefebvre, S., Rouxel, C., Saint-Jean, B., Lukomska,  
14 E., Robert, R. and Cadoret, J.P.: Effects of blue light on the biochemical composition and  
15 photosynthetic activity of *Isochrysis* sp. (T-iso). J. Appl. Phycol. 25: 109-119, 2013.

16 Meleder, V., Barille, L., Launeau, P., Carrere, V. and Rince, Y.: Spectrometric constraint in  
17 analysis of benthic diatom biomass using monospecific cultures. Remote Sens. Environ. 88:  
18 386-400, 2003.

19 Meleder, V., Laviale, M., Jesus, B., Mouget, J.L., Lavaud, J., Kazemipour, F., Launeau, P.,  
20 and Barille, L.: In vivo estimation of pigment composition and optical absorption cross-  
21 section by spectroradiometry in four aquatic photosynthetic micro-organisms. J. Photochem.  
22 Photobiol. B-Biol. 129: 115-124, 2013.

23 Moodley, L., Middelburg, J.J., Boschker, H.T.S., Duineveld, G.C.A., Pel, R., Herman, P.M.J.  
24 and Heip, C.H.R.: Bacteria and Foraminifera: key players in a short-term deep-sea benthic  
25 response to phytodetritus. Mar. Ecol. Prog. Ser. 236: 23-29, 2002.

26 Morvan, J., Debenay, J.-P., Jorissen, F., Redois, F., Beneteau, E., Delplancke, M. and Amato,  
27 A.-S. Patchiness and life cycle of intertidal foraminifera: Implication for environmental and  
28 paleoenvironmental interpretation. Mar. Micropaleontol. 61: 131-154, 2006.

1 Mouget J.-L., Perkins R.G., Consalvey M. and Lefebvre S.: Migration or photoacclimation to  
2 prevent photoinhibition and UV-B damage in marine microphytobenthic communities. *Aquat.*  
3 *Microb. Ecol.* 52: 223-232, 2008.

4 Papacek, S., Celikovský, S., Rehak, B. and Stys, D.: Experimental design for parameter  
5 estimation of two time-scale model of photosynthesis and photoinhibition in microalgae.  
6 *Math. Comput. Simul.* 80: 1302-1309, 2010.

7 Pascal, P.-Y., Dupuy, C., Richard, P., Mallet, C., du Chatelet, E.A. and Niquil, N.: Seasonal  
8 variation in consumption of benthic bacteria by meio- and macrofauna in an intertidal  
9 mudflat. *Limnol. Oceanogr.* 54: 1048-1059, 2009.

10 Perkins, R.G., Lavaud, J., Serodio, J., Mouget, J.L., Cartaxana, P., Rosa, P., Barille, L.,  
11 Brotas, V. and Jesus, B.M.: Vertical cell movement is a primary response of intertidal benthic  
12 biofilms to increasing light dose. *Mar. Ecol. Prog. Ser.* 416: 93-103, 2010.

13 Perkins, R.G., Mouget, J.-L., Lefebvre, S. and Lavaud, J.: Light response curve methodology  
14 and possible implications in the application of chlorophyll fluorescence to benthic diatoms.  
15 *Mar. Biol.* 149: 703-712, 2006.

16 Perkins, R.G., Underwood, G.J.C., Brotas, V., Snow, G.C., Jesus, B. and Ribeiro, L.:  
17 Responses of microphytobenthos to light: primary production and carbohydrate allocation  
18 over an emersion period. *Mar. Ecol. Prog. Ser.* 223: 101-112, 2001.

19 Pillet, L., de Vargas, C. and Pawlowski, J.: Molecular identification of sequestered diatom  
20 chloroplasts and kleptoplastidy in foraminifera. *Protist.* 162: 394-404, 2011.

21 Pillet, L. and Pawlowski, J.: Transcriptome analysis of foraminiferan *Elphidium*  
22 *margaritaceum* questions the role of gene transfer in kleptoplastidy. *Mol. Biol. Evol.* 30: 66-  
23 69, 2013.

24 Pina-Ochoa, E., Hogslund, S., Geslin, E. and others: Widespread occurrence of nitrate storage  
25 and denitrification among foraminifera and gromiida. *Proc. Natl. Acad. Sci. U.S.A.* 107:  
26 1148-1153, 2010.

27 Platt, T., Gallegos, C.L. and Harrison, W.G.: Photoinhibition of photosynthesis in natural  
28 assemblages of marine phytoplankton. *J. Mar. Res.* 38: 687-701, 1980.

29 Revsbech, N.P.: An oxygen microsensor with a guard cathode. *Limnol. Oceanogr.* 34: 474-  
30 478, 1989.

1 Rink, S., Kuhl, M., Bijma, J. and Spero, H.J.: Microsensor studies of photosynthesis and  
2 respiration in the symbiotic foraminifer *Orbulina universa*. Mar. Biol. 131: 583-595, 1998.

3 Risgaard-Petersen, N., Langezaal, A.M., Ingvarsdén, S. and others: Evidence for complete  
4 denitrification in a benthic foraminifer. Nature. 443: 93-96, 2006.

5 Rumpho, M.E., Summer, E.J., Green, B.J., Fox, T.C. and Manhart, J.R.: Mollusc/algal  
6 chloroplast symbiosis: how can isolated chloroplasts continue to function for months in the  
7 cytosol of a sea slug in the absence of an algal nucleus? Zoology. 104: 303-312, 2001.

8 Serodio, J., Pereira, S., Furtado, J., Silva, R., Coelho, H. and Calado, R.: In vivo  
9 quantification of kleptoplastic chlorophyll a content in the "solar-powered" sea slug *Elysia*  
10 *viridis* using optical methods: spectral reflectance analysis and PAM fluorometry. Photochem.  
11 Photobiol. Sci. 9: 68-77, 2010.

12 Thibault de Chanvalon, A., Metzger, E., Mouret, A., Cesbron, F., Knoery, J., Rozuel, E.,  
13 Launeau, P., Nardelli, M. P., Jorissen, F. J., and Geslin, E.: Two-dimensional distribution of  
14 living benthic foraminifera in anoxic sediment layers of an estuarine mudflat (Loire estuary,  
15 France), Biogeosciences, 12:6219-6234, 2015..

16 Trench, R.K., Trench, M.E. and Muscatin. L.: Symbiotic chloroplasts; their photosynthetic  
17 products and contribution to mucus synthesis in two marine slugs. Biol. Bull. 142: 335-349,  
18 1972.

19 Tsuchiya, M., Toyofuku, T., Uematsu, K., Brüchert, V., Collen, J., Yamamoto, H., Kitazato,  
20 H.: Cytologic and genetic characteristics of endobiotic bacteria and kleptoplasts of  
21 *Virgulinema fragilis* (Foraminifera). J. Euk. Microbiol. 62, 454-469, 2015.

22 Tyystjärvi, E. and Aro, E.M.: The rate constant of photoinhibition, measured in lincomycin-  
23 treated leaves, is directly proportional to light intensity. Proc. Natl. Acad. Sci. U.S.A. 93:  
24 2213-2218, 1996.

25 Ventura, P., Calado, G. and Jesus, B.: Photosynthetic efficiency and kleptoplast pigment  
26 diversity in the sea slug *Thuridilla hopei* (Verany, 1853). J. Exp. Mar. Biol. Ecol. 441: 105-  
27 109, 2013.

28 Vieira, S., Calado, R., Coelho, H. and Serodio, J.: Effects of light exposure on the retention of  
29 kleptoplastic photosynthetic activity in the sacoglossan mollusc *Elysia viridis*. Mar. Biol. 156:  
30 1007-1020, 2009.

**Supprimé:** Teugels, B., Bouillon, S., Veuger, B., Middelburg, J.J. and Koedam, N.: Kleptoplasts mediate nitrogen acquisition in the sea slug *Elysia viridis*. Aquat. Biol. 4: 15-21, 2008.¶

- 1 Yamaguchi, K., Mayfield, S., and Sugita, M.: Transcriptional and Translational Regulation of
- 2 Photosystem II Gene Expression. In: Wydrzynski, T., Satoh, K., Freeman, J. (Eds.),
- 3 Photosystem II. Springer Netherlands, pp. 649-668, 2005.
- 4

**Supprimé:** Zehr, J.P., and Falkowski, P.G.: Pathway of ammonium assimilation in a marine diatom determined with radiotracer N-13. *J. Phycol.* 24: 588-591, 1988.¶

1 Table 1. Light and dark respiration rates ( $\text{pmol O}_2 \text{ cell}^{-1} \text{ d}^{-1}$ )  $\pm$  SD of *Haynesina germanica* in  
 2 the three experimental conditions (Dark, Low Light and High Light) at the end of the  
 3 experiment (Df, degree of freedom, PFD Photon Flux Density).

4

| Condition   | PFD                 | Respiration Rate ( $\text{pmol O}_2 \text{ cell}^{-1} \text{ d}^{-1}$ ) |        |        |
|-------------|---------------------|-------------------------------------------------------------------------|--------|--------|
| D           | 300                 | 2452 $\pm$ 537                                                          |        |        |
|             | 0                   | 3542 $\pm$ 765                                                          |        |        |
| LL          | 300                 | 3468 $\pm$ 305                                                          |        |        |
|             | 0                   | 4015 $\pm$ 110                                                          |        |        |
| HL          | 300                 | 1179 $\pm$ 261                                                          |        |        |
|             | 0                   | 1905 $\pm$ 235                                                          |        |        |
| Anova       |                     | Df                                                                      | F-test | p      |
| Condition   | p ( $\alpha=0.05$ ) | 2                                                                       | 13.1   | <0.001 |
| PFD         | p ( $\alpha=0.05$ ) | 1                                                                       | 5.4    | 0.026  |
| Interaction | p ( $\alpha=0.05$ ) | 2                                                                       | 0.3    | 0.78   |

5

6



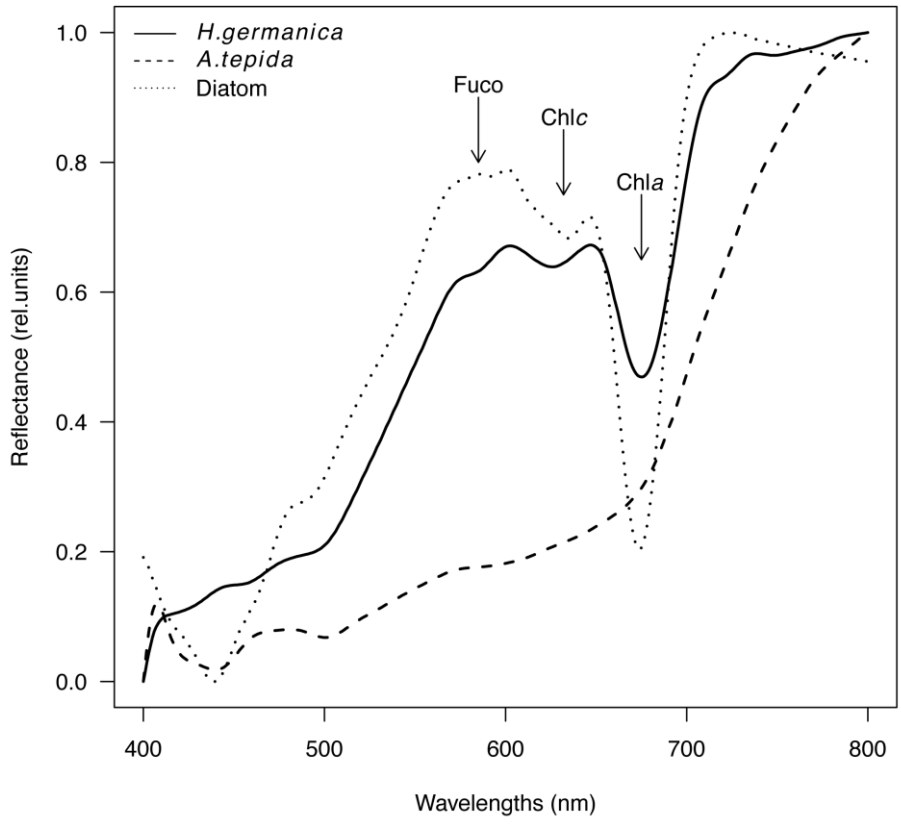

1  
 2 Figure 1. Spectral reflectance signatures of *Haynesina germanica*, *Ammonia tepida* and of a  
 3 benthic diatom in relative units (X-axis legend: Wavelength (nm)).  
 4

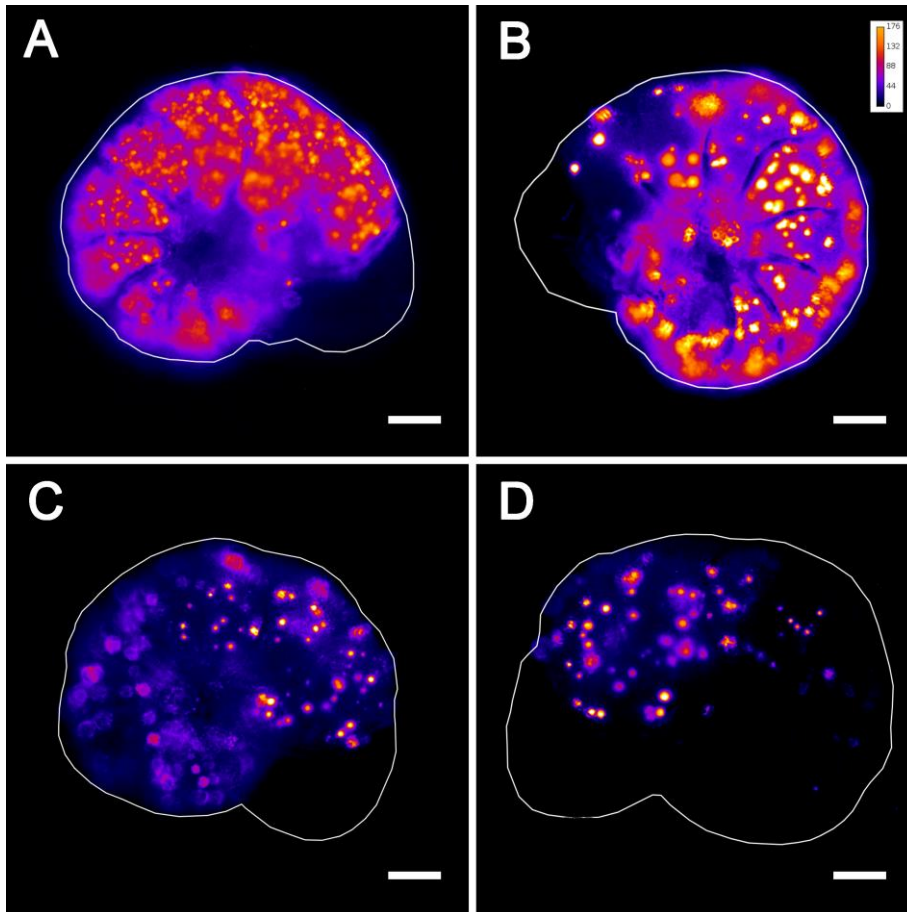

1  
 2 Figure 2. Illustration of *Haynesina germanica* chloroplast content at the beginning (A) and at  
 3 the end of the experiment for the three experimental conditions, Dark (B), Low Light (C) and  
 4 High Light (D). Higher colour scale values correspond to foraminifera emitting more  
 5 fluorescence and likely containing more chlorophyll *a*; fluorescence in pixel values between 0  
 6 and 255, (scale bar = 50 μm).  
 7

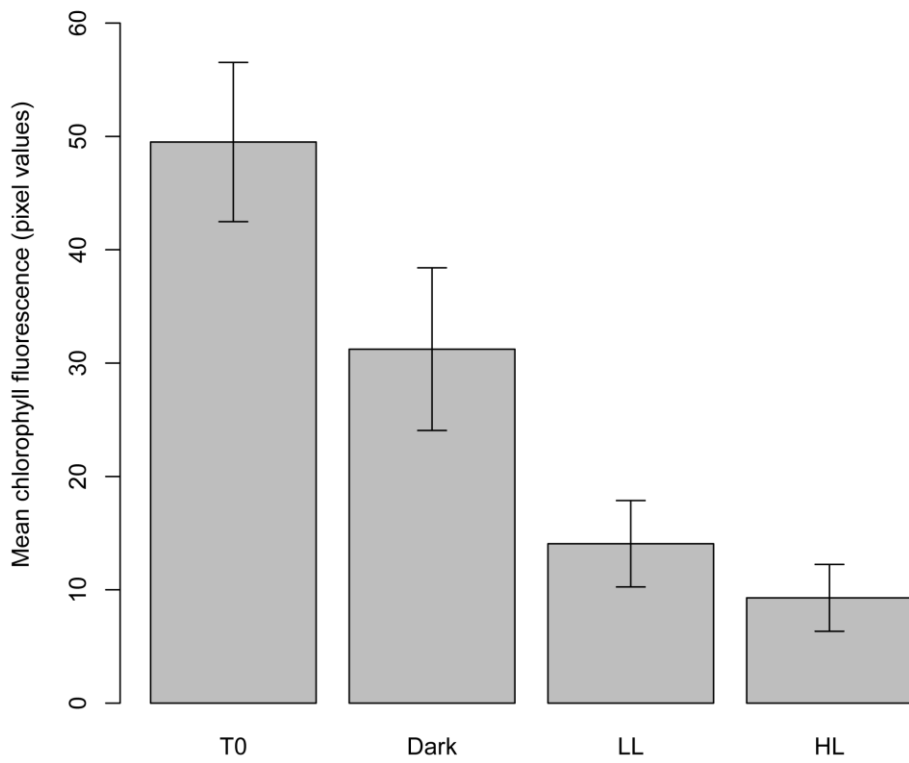

1  
 2 Figure 3. Mean chlorophyll *a* fluorescence ( $\pm$  SE,  $n = 30$ ) at the end for the three experimental  
 3 conditions (Dark, Low Light and High Light) and the beginning (T0) of the experiment using  
 4 *Haynesina germanica*. Higher mean values likely corresponded to foraminifera containing  
 5 more chlorophyll.  
 6

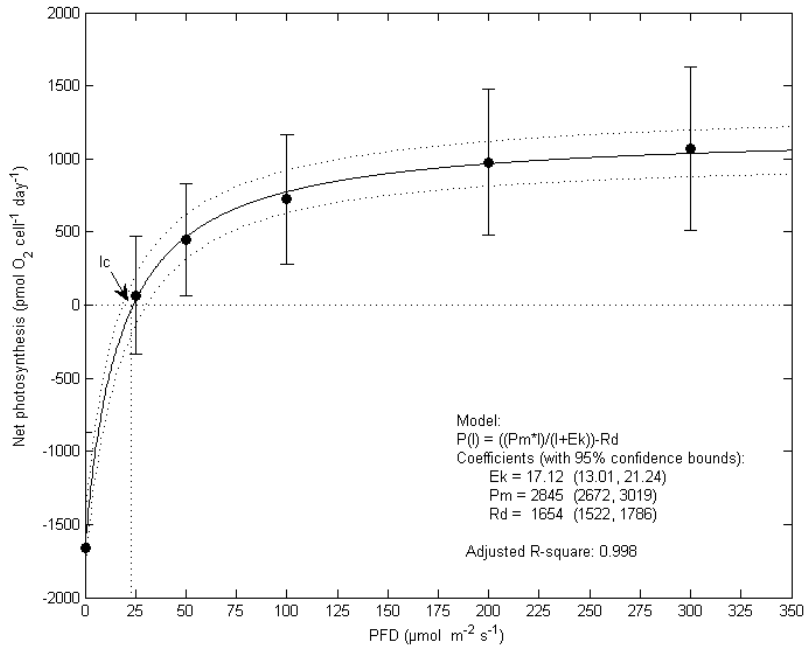

1  
2 Figure 4. Net photosynthesis of *Haynesina germanica* ( $\text{pmol O}_2 \text{ cell}^{-1} \text{ d}^{-1}$ ) as a function of the  
3 photon flux density (PFD,  $\mu\text{mol photons m}^{-2} \text{ s}^{-1}$ ). The half-saturation constant,  $E_k$ , was found  
4 at 17 (13-21), the dark respiration,  $R_d$ , at 1654 (1522-1786)  $\text{pmol O}_2 \text{ cell}^{-1} \text{ d}^{-1}$  and the  
5 maximum photosynthetic capacity,  $P_m$ , at 2845 (2672-3019)  $\text{pmol O}_2 \text{ cell}^{-1} \text{ d}^{-1}$ . The  $I_c$ ,  
6 calculated compensation irradiance (24 (17-30)  $\mu\text{mol photons m}^{-2} \text{ s}^{-1}$ ). The adjusted  $R^2$  of the  
7 model was equal to 0.998,  $n = 3$ .  
8

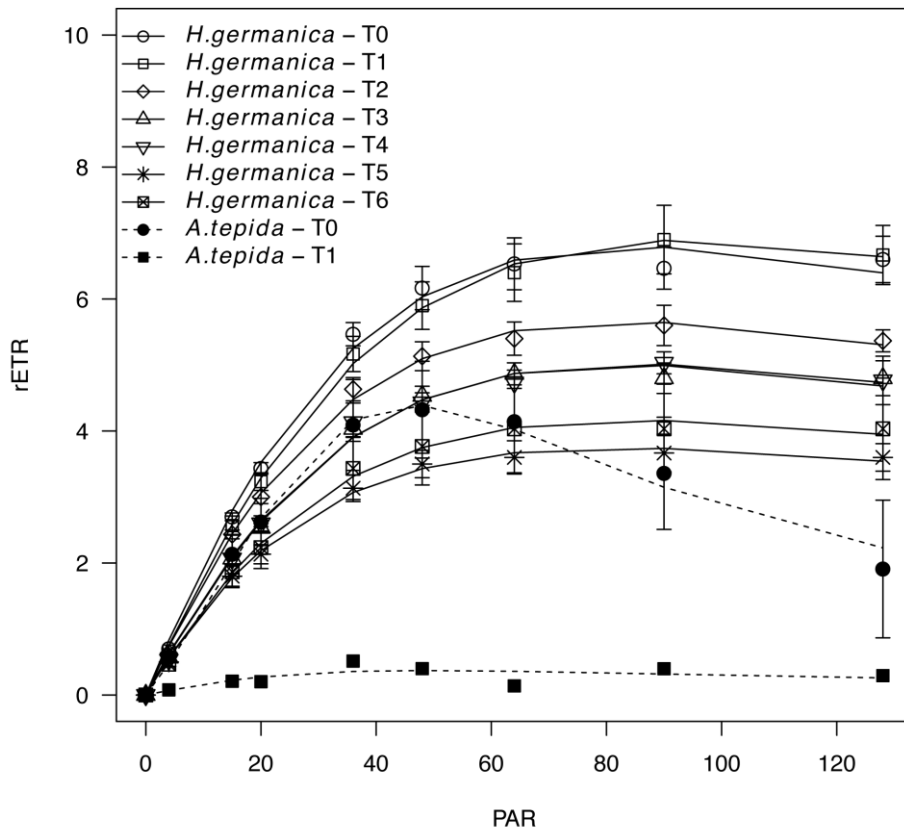

1  
 2 Figure 5. Rapid light curves (RLC, n = 3) expressed as the relative electron transport rate  
 3 (rETR) as a function of the photosynthetic active radiation (PAR in  $\mu\text{mol photons m}^{-2} \text{s}^{-1}$ ) of  
 4 *Haynesina germanica* (black lines) and *Ammonia tepida* (black dashed lines) during the seven  
 5 days of the experiment.  
 6

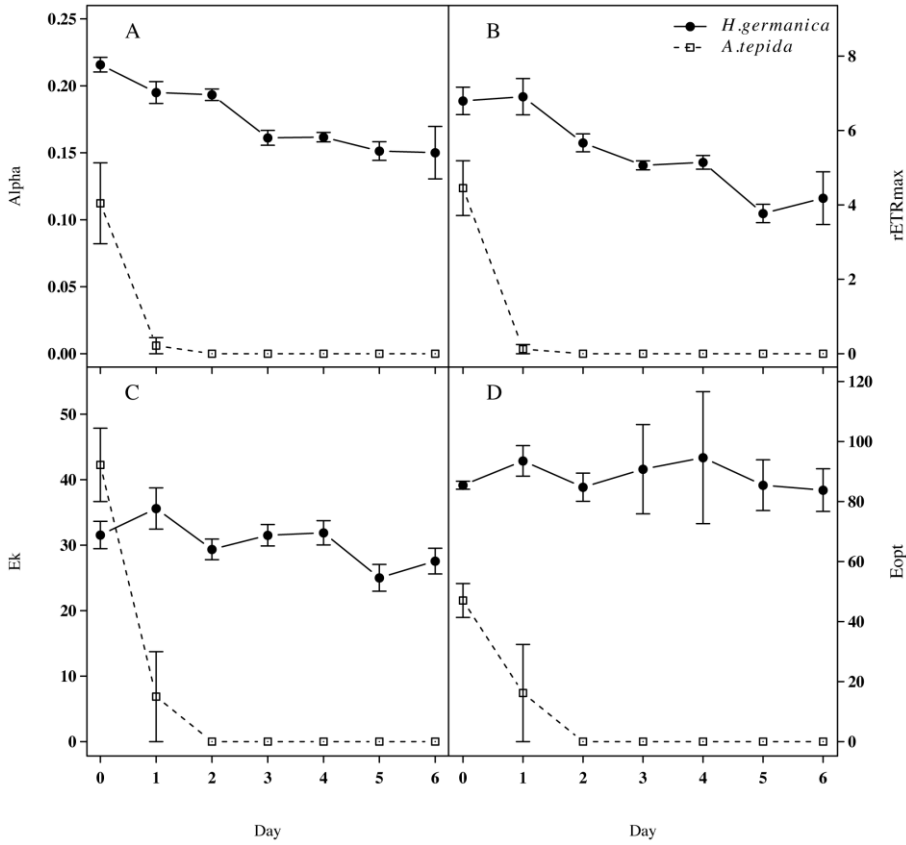

1  
 2 Figure 6. Rapid light curve (RLC, n = 3) parameters for *Haynesina germanica* (Dark-RLC)  
 3 and *Ammonia tepida* maintained in the dark during the experiment, Alpha is the initial slope  
 4 of the RLC at limiting irradiance, rETRmax is the maximum relative electron transport rate,  
 5 Ek is the light saturation coefficient and Eopt is the optimum light, all of them were estimated  
 6 by adjusting the experimental data to fit the model of Platt et al. (1980).  
 7

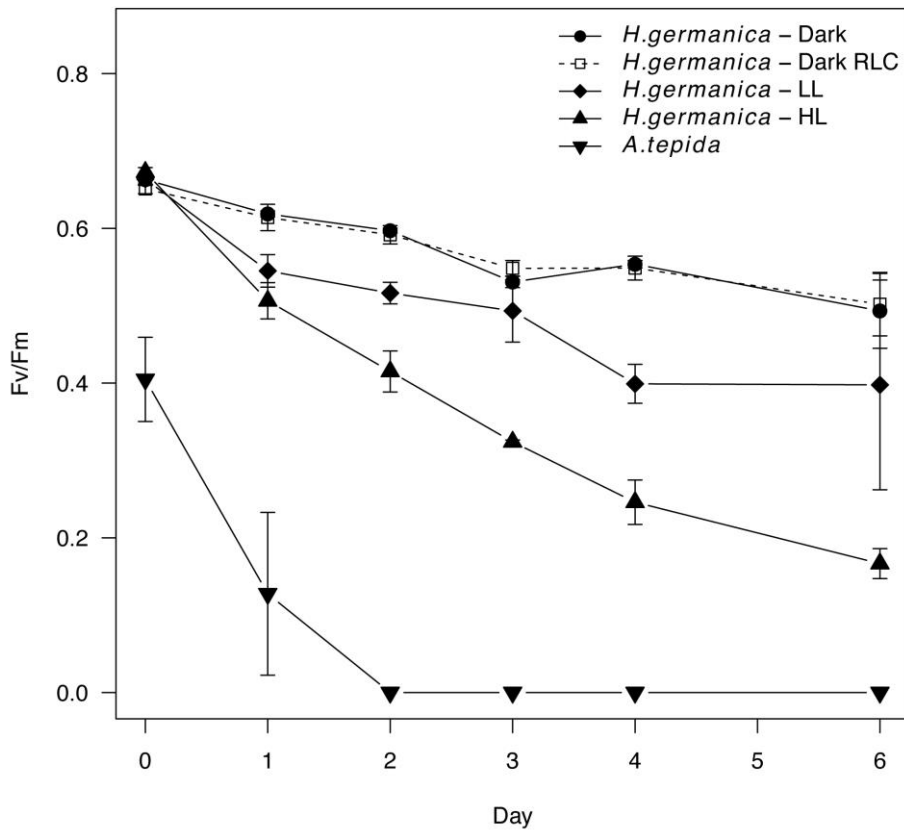

1  
 2 Figure 7. Maximum quantum efficiency of the photosystem II ( $F_v/F_m$ ,  $n = 3$ ) during the  
 3 experiment for the different applied conditions (Dark, Low Light and High Light) and species  
 4 (*Haynesina germanica* and *Ammonia tepida*).
